# Supplementary material for: Metabolomics Based on 1H-NMR Reveal the Regulatory Mechanisms of Dietary Methionine Restriction on Splenic Metabolic Dysfunction in Obese Mice
Source: MDPI journal article supplement (doi:10.3390/foods10102439), 2021-10-14
Supplement: s1 [file s1]

## Supporting information

**Table S1.** The ingredients of the experimental diets (g/100 g of diet)

| Ingredient                   | CON    | DIO    | DIO+MR |
|------------------------------|--------|--------|--------|
| Soy protein <sup>1</sup>     | 7.59   | 7.59   | 7.59   |
| L-Arginine                   | 0.66   | 0.66   | 0.66   |
| L-Histidine                  | 0.18   | 0.18   | 0.18   |
| L-Isoleucine                 | 0.51   | 0.51   | 0.51   |
| L-Leucine                    | 0.64   | 0.64   | 0.64   |
| L-Lysine                     | 0.11   | 0.11   | 0.11   |
| L-Methionine <sup>2</sup>    | 0.69   | 0.69   | 0.00   |
| L-Phenylalanine              | 0.85   | 0.85   | 0.85   |
| L-Threonine                  | 0.65   | 0.65   | 0.65   |
| L-Tryptophan                 | 0.10   | 0.10   | 0.10   |
| L-Valine                     | 0.57   | 0.57   | 0.57   |
| L-Glutamic acid <sup>2</sup> | 1.37   | 1.37   | 2.06   |
| L-Glycine                    | 2.08   | 2.08   | 2.08   |
| Corn starch                  | 64.09  | 44.29  | 44.29  |
| maltodextrin                 | 5.00   | 5.00   | 5.00   |
| Sucrose                      | 0.10   | 0.10   | 0.10   |
| Soybean oil                  | 2.00   | 2.00   | 2.00   |
| Pork Lard                    | 2.20   | 22.00  | 22.00  |
| Cellulose                    | 5.00   | 5.00   | 5.00   |
| Mineral mixture-AIN-76A      | 3.50   | 3.50   | 3.50   |
| Mineral vitamin-AIN-76A      | 1.00   | 1.00   | 1.00   |
| Choline chloride             | 0.11   | 0.11   | 0.11   |
| CMC                          | 1.00   | 1.00   | 1.00   |
| Total                        | 100.00 | 100.00 | 100.00 |

CON, control diet group; DIO, obese + high fat diet group; DIO + MR, obese + high fat with low-methionine diet group. <sup>1</sup> Amino acid composition of soy protein were as follows: 6.19% leucine, 4.11% isoleucine, 5.49% valine, 1.18% methionine, 1.66% cysteine, 4.09% phenylalanine, 2.57% tyrosine, 4.83% lysine, 2.21% threonine, 1.07% tryptophan, 1.99% histidine, 6.11% arginine, 3.30% serine, 3.25% alanine, 5.56% proline, 3.27% glycine, 17.49% glutamic acid 9.44% aspartic acid. 1 g cysteine is equal to 0.64 g methionine. <sup>2</sup> When the methionine content in the diet was decreased, the glutamic acid was increased to compensate for the reduced methionine content and to create equal amounts of total amino acids.

**Table S2.** Sequences of primers used in quantitative real-time reverse transcription PCR

| Gene name      | Forward primer (5'–3')     | Reverse primer (5'–3')   |
|----------------|----------------------------|--------------------------|
| GLUT4          | CCTTTGCACACGGCTTCCGA       | TGTTCAATCACCTTCTGTGGGGCA |
| HK2            | TGCTGCCGACCTTTGTGA         | AAGGTCCAGAGCCAGGAACTC    |
| PFK            | TGTGGTCCGAGTTGGTATCTT      | GCACTTCCAATCACTGTGCC     |
| PKM            | AGGGGCACCCAAGTACATC        | TGCCGGAGGAAAGTGAATGAC    |
| TFAM           | ATCCCCTCGTCTATCAGTCTTGTCT  | TTCTGCTTCTGGTAGCTCCCTC   |
| PGC-1 $\alpha$ | CAAGCCAAACCAACAACCTTTATCTC | AAGCCTTGAAAGGGTTATCTTGGT |
| mTORC1         | AGGAACTAGAGGTAGCTGCGATTAA  | GAGTGGTGAGGCAGGATGTGAA   |
| LC3b           | CCCACCAAGATCCCAGTGAT       | CCAGGAACTTGGTCTTGTCCA    |
| ATG4b          | CATCCATCAGATAGCGCAAA       | TGATTTCTCCATCACCACA      |
| ATG5           | GACAGATTTGACCAGTTTTGGGC    | GGGTTTCCAGCATTGGCTCTATC  |
| ATG7           | TGCCTATGATGATCTGTGTC       | CACCAACTGTTATCTTTGTCC    |
| ATG12          | GGCCTCGGAACAGTTGTTTA       | CAGCACCGAAATGTCTCTGA     |
| Beclin1        | GGAAAAGAACCGCAAGGTGGTG     | AAACTGTCCGCTGTGCCAGATG   |
| ULK1           | GCTCCGGTGACTTACAAAGCTG     | GCTGACTCCAAGCCAAAGCA     |
| Lamp1          | CTCTGCCTCCTTTCTGACCA       | GCAGGGAAATGTTACGAT       |
| Lamp2 $\alpha$ | GATGTGCCTCTCTCCGGTTA       | ATTGGACTGAACGGCTCCTA     |
| Gabarap        | AAGAGGAGCATCCGTTTCGAGA     | GCTTTGGGGGCTTTTTCCAC     |
| Gabarapl1      | GGACCACCCCTTCGAGTATC       | CCTCTTATCCAGATCAGGGACC   |
| $\beta$ -actin | GGGTCAGAAGGACTCCTATG       | GTAACAATGCCATGTTCAAT     |

GLUT4, glucose transporter 4; HK2, hexokinase2; PFK, phosphate fructose kinase; PKM, pyruvate kinase; TFAM, mitochondrial transcription factor A; PGC-1 $\alpha$ , peroxisome proliferator-activated receptor gamma coactivator 1-alpha; mTORC1, mammalian target of rapamycin complex 1; LC3b, microtubule-associated proteins light chain 3b; ATG4b, ATG5, ATG7, ATG12, autophagy related genes; ULK1, unc-51-like kinase 1; Lamp1, Lamp2 $\alpha$ , lysosome assoc membrane proteins; Gabarap, gamma-aminobutyric acid receptor-associated protein; Gabarapl1, Gabarap-like 1.

**Table S3.** <sup>1</sup>H chemical shift assignment of the metabolites in the spleen of mice

| Keys | Metabolites                 | Moieties                                                                                               | $\delta$ <sup>1</sup> H (ppm) and multiplicity                            |
|------|-----------------------------|--------------------------------------------------------------------------------------------------------|---------------------------------------------------------------------------|
| 1    | Isoleucine                  | $\alpha$ CH, $\beta$ CH, $\beta$ CH <sub>3</sub> , $\gamma$ CH <sub>2</sub> , $\delta$ CH <sub>3</sub> | 3.68(d), 1.99(m), 1.01(d), 1.26(m), 1.47(m), 0.94(t)                      |
| 2    | 2-Aminobutyrate             | $\beta$ CH <sub>3</sub> , $\alpha$ CH <sub>2</sub> , O-CH <sub>3</sub>                                 | 0.96(t), 1.91(m), 3.68(t)                                                 |
| 3    | Valine                      | $\alpha$ CH <sub>3</sub> , $\beta$ CH, $\gamma$ CH <sub>3</sub>                                        | 3.62(d), 2.28(m), 0.99(d), 1.04(d)                                        |
| 4    | 3-Hydroxybutyrate           | $\gamma$ CH <sub>3</sub> , $\alpha$ CH <sub>2</sub> , $\beta$ CH                                       | 1.20(d), 2.28(dd), 2.42(dd), 4.16(m)                                      |
| 5    | Lactate                     | $\beta$ CH <sub>3</sub> , $\alpha$ CH                                                                  | 1.33(d), 4.12(q)                                                          |
| 6    | Alanine                     | $\beta$ CH <sub>3</sub> , $\alpha$ CH                                                                  | 1.48(d), 3.77(q)                                                          |
| 7    | Leucine                     | $\alpha$ CH, $\beta$ CH <sub>2</sub> , $\gamma$ CH, $\delta$ CH <sub>3</sub>                           | 3.73(t), 1.72(m), 0.96(d), 0.91(d)                                        |
| 8    | Arginine                    | $\gamma$ CH <sub>2</sub> , $\beta$ CH <sub>2</sub> , $\delta$ CH <sub>2</sub> , $\alpha$ CH            | 1.73(m), 1.93(m), 3.23(t), 3.75(t)                                        |
| 9    | Lysine                      | $\alpha$ CH, $\beta$ CH <sub>2</sub> , $\gamma$ CH <sub>2</sub> , $\delta$ CH <sub>2</sub>             | 3.77(t), 1.89(m), 1.74(m)                                                 |
| 10   | Acetate                     | CH <sub>3</sub>                                                                                        | 1.92(s)                                                                   |
| 11   | Glutamate                   | $\alpha$ CH, $\beta$ CH <sub>2</sub> , $\gamma$ CH <sub>2</sub>                                        | 2.05(m), 2.12(m), 2.35(m), 3.75(m)                                        |
| 12   | Glutamine                   | $\alpha$ CH, $\beta$ CH <sub>2</sub> , $\gamma$ CH <sub>2</sub>                                        | 3.68(t), 2.10(m), 2.15(m), 2.45(m)                                        |
| 13   | Methionine                  | $\alpha$ CH, $\beta$ CH <sub>2</sub> , $\gamma$ CH <sub>2</sub> , S-CH <sub>3</sub>                    | 3.87(t), 2.11(m), 2.65(t), 2.14(s)                                        |
| 14   | Glutathione                 | $\alpha$ CH, $\alpha$ CH <sub>2</sub> , $\beta$ CH <sub>2</sub> , $\gamma$ CH <sub>2</sub>             | 2.16(m), 2.57(m), 2.95(dd), 4.58(m)                                       |
| 15   | Acetoacetate                | CH <sub>3</sub>                                                                                        | 2.32(s)                                                                   |
| 16   | Malate                      | $\beta$ CH <sub>2</sub> , $\beta'$ CH <sub>2</sub> , $\alpha$ CH                                       | 2.36(dd), 2.67(dd), 4.31(m)                                               |
| 17   | Pyruvate                    | CH <sub>3</sub>                                                                                        | 2.38(s)                                                                   |
| 18   | 2-Oxoglutarate              | $\alpha$ CH <sub>2</sub> , $\beta$ CH <sub>2</sub>                                                     | 2.41(t), 2.98(t)                                                          |
| 19   | Citrate                     | CH <sub>2</sub>                                                                                        | 2.55(d), 2.68(d)                                                          |
| 20   | Aspartate                   | CH <sub>2</sub> , -CH-NH <sub>2</sub>                                                                  | 2.67(dd), 2.81(dd), 3.9(dd)                                               |
| 21   | Sarcosine                   | CH <sub>3</sub> , CH <sub>2</sub>                                                                      | 2.76(s), 3.65(s)                                                          |
| 22   | Asparagine                  | CH <sub>2</sub>                                                                                        | 2.83(dd), 2.95(dd)                                                        |
| 23   | Trimethylamine              | CH <sub>3</sub>                                                                                        | 2.88(s)                                                                   |
| 24   | Histamine                   | CH <sub>2</sub> , CH, N-CH=N                                                                           | 3.00(t), 3.29(t), 6.8(s), 7.97(s)                                         |
| 25   | Creatine phosphate          | N-CH <sub>3</sub> , CH <sub>2</sub>                                                                    | 3.01(s), 3.94(s)                                                          |
| 26   | Creatine                    | CH <sub>3</sub> , CH <sub>2</sub>                                                                      | 3.03(s), 3.93(s)                                                          |
| 27   | Creatinine                  | CH <sub>3</sub> , CH <sub>2</sub>                                                                      | 3.04(s), 4.05(s)                                                          |
| 28   | Phenylalanine               | 2,6-CH, 3,5-CH, 4-CH                                                                                   | 3.11(d), 7.32 (m), 7.42 (m), 7.37 (m)                                     |
| 29   | Ethanolamine                | CH <sub>2</sub> -NH <sub>2</sub> , CH <sub>2</sub> -OH                                                 | 3.13(t), 3.83(t)                                                          |
| 30   | Choline                     | O-CH <sub>2</sub> , N-CH <sub>2</sub> , N-(CH <sub>3</sub> ) <sub>3</sub>                              | 4.07(t), 3.53(t), 3.20(s)                                                 |
| 31   | O-Phosphocholine            | O-CH <sub>2</sub> , N-CH <sub>2</sub> , N-(CH <sub>3</sub> ) <sub>3</sub>                              | 3.21(s), 3.57(m), 4.17(m)                                                 |
| 32   | O-Phosphoethanolamine       | O-CH <sub>2</sub> , CH <sub>2</sub> -NH <sub>2</sub>                                                   | 3.22(m), 3.98(m)                                                          |
| 33   | sn-Glycero-3-phosphocholine | CH, CH <sub>2</sub> , O-CH <sub>2</sub> , N-CH <sub>2</sub> , N-(CH <sub>3</sub> ) <sub>3</sub>        | 3.23(s), 3.6(dd), 3.67(m), 3.68(dd), 3.86(m), 3.92(m), 3.95(m), 4.32(m)   |
| 34   | Trimethylamine N-oxide      | CH <sub>3</sub>                                                                                        | 3.24(s)                                                                   |
| 35   | Taurine                     | -CH <sub>2</sub> -S, -CH <sub>2</sub> -NH <sub>2</sub>                                                 | 3.27(t), 3.43(t)                                                          |
| 36   | Betaine                     | CH <sub>3</sub> , CH <sub>2</sub>                                                                      | 3.30(s), 3.94(s)                                                          |
| 37   | Tryptophan                  | $\beta$ CH <sub>2</sub> , $\beta'$ CH <sub>2</sub> , $\alpha$ CH, 5CH, 6CH, 2CH, 7CH, 4CH              | 3.31(dd), 3.49(dd), 4.06(dd), 7.2 (t), 7.27(t), 7.30(s), 7.55(d), 7.73(d) |
| 38   | Methanol                    | CH <sub>3</sub>                                                                                        | 3.36(s)                                                                   |
| 39   | myo-Inositol                | 5-CH, 4,6-CH, 2-CH                                                                                     | 3.28(t), 3.53(dd), 3.62(t), 4.06(m)                                       |
| 40   | Glycine                     | CH <sub>2</sub>                                                                                        | 3.56(s)                                                                   |
| 41   | Glycerol                    | CH, CH <sub>2</sub>                                                                                    | 3.56(dd), 3.65(dd), 3.78(m)                                               |
| 42   | Serine                      | -CH-NH <sub>2</sub> , CH <sub>2</sub>                                                                  | 3.84(dd), 3.95(dd), 3.99(dd)                                              |
| 43   | Threonine                   | $\alpha$ CH, $\beta$ CH, $\gamma$ CH <sub>3</sub>                                                      | 1.32(d), 4.25(m), 3.58(d)                                                 |

|    |              |                                                                      |                                                                   |
|----|--------------|----------------------------------------------------------------------|-------------------------------------------------------------------|
| 44 | ADP          | N-CH-N, N-CH=N, C-NH <sub>2</sub> , N-CH, CH-OH, CH, CH <sub>2</sub> | 4.2(m), 4.37(m), 4.57(dd), 4.74(dd), 6.13(dd), 8.27(s), 8.58(s)   |
| 45 | ATP          | N-CH-N, N-CH=N, C-NH <sub>2</sub> , N-CH, CH-OH, CH, CH <sub>2</sub> | 4.2(m), 4.44(m), 4.57(dd), 4.74(dd), 6.15(d), 8.23(s), 8.38(s)    |
| 46 | AMP          | N-CH-N, N-CH=N, N-CH, CH-OH, CH, CH <sub>2</sub>                     | 4.01(m), 4.36(m), 4.49(m), 4.78(dd), 6.11(d), 8.24(s), 8.62(s)    |
| 47 | β-Glucose    | 1-CH, 2-CH, 3-CH, 4-CH, 5-CH, 6-CH                                   | 4.65(d), 3.25(dd), 3.49(t), 3.41(dd), 3.46(m), 3.73(dd), 3.90(dd) |
| 48 | α-Glucose    | 1-CH, 2-CH, 3-CH, 4-CH, 5-CH, 6-CH                                   | 5.24(d), 3.54(dd), 3.71(dd), 3.42(dd), 3.84(m), 3.78(m)           |
| 49 | Uracil       | 5-CH, 6-CH                                                           | 5.8(d), 7.53(d)                                                   |
| 50 | Uridine      | 2-CH, 5-CH, 1-CH, 6-CH                                               | 4.36(t), 5.9(d), 5.92(d), 7.88(d)                                 |
| 51 | Cytidine     | 1-CH, 5-CH, 6-CH                                                     | 5.92(d), 6.06(d), 7.85(d)                                         |
| 52 | Inosine      | 3-CH, 1-CH, 8-CH, 2-CH                                               | 4.44(dd), 6.11(d), 8.24(s), 8.35(s)                               |
| 53 | Fumarate     | CH, CH <sub>3</sub>                                                  | 6.52(s)                                                           |
| 54 | Tyrosine     | 2,6-CH, 3,5-CH                                                       | 7.19(dd), 6.90(d)                                                 |
| 55 | Histidine    | αCH, βCH <sub>2</sub>                                                | 7.88(s), 7.09(s)                                                  |
| 56 | Benzoate     | 3,4,5-CH, 2,6-CH                                                     | 7.48(m), 7.60(m), 7.86(m)                                         |
| 57 | Xanthine     | CH                                                                   | 7.90(s)                                                           |
| 58 | Oxypurinol   | N-CH                                                                 | 8.19(s)                                                           |
| 59 | Hypoxanthine | N-CH, CH                                                             | 8.19(s), 8.21(s)                                                  |
| 60 | Formate      | CH                                                                   | 8.46(s)                                                           |
| 61 | Niacinamide  | O=C-NH <sub>2</sub> , 5-CH, 4-CH, NH-CH                              | 7.6(dd), 8.26(m), 8.72(m), 8.94(d)                                |

s, singlet; d, doublet; t, triplet; q, quartet; dd, doublet of doublets; m, multiplet; ATP, adenosine triphosphate; ADP, adenosine diphosphate; AMP, adenosine monophosphate.
